# Supplementary material for: Exploring the molecular basis of neuronal excitability in a vocal learner
Source: PubMed Central journal article supplement (PMC6679542; doi:10.1186/s12864-019-5871-2), 2019-08-02

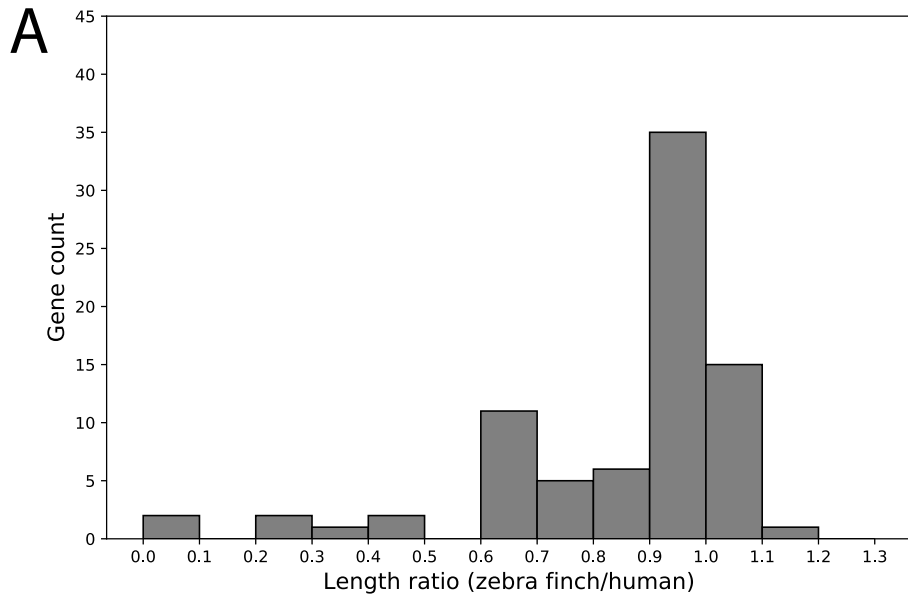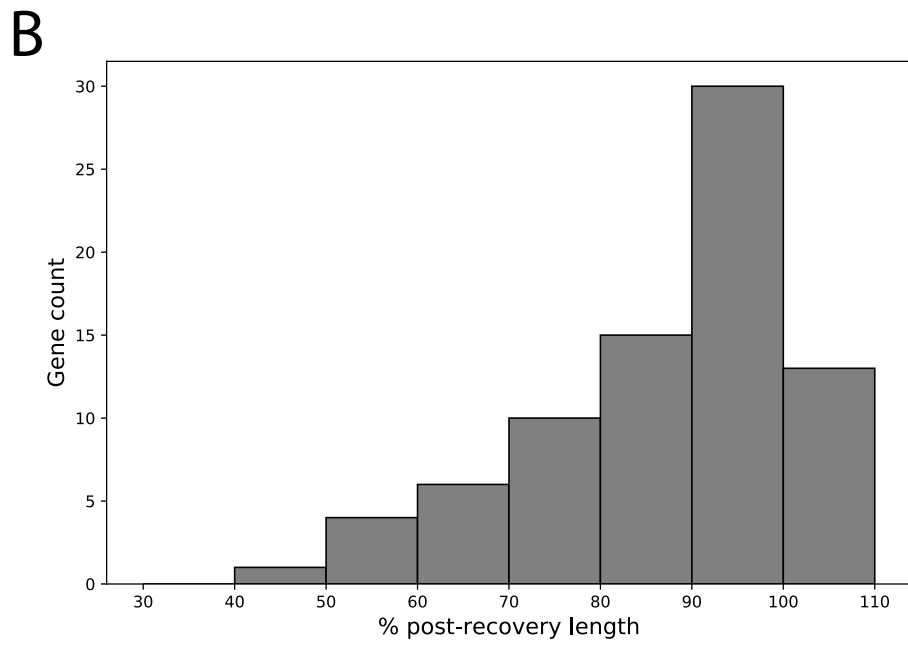

Supplement: 12864_2019_5871_MOESM4_ESM.pdf [file 12864_2019_5871_MOESM4_ESM.pdf]
