# Supplementary material for: Exploring the molecular basis of neuronal excitability in a vocal learner
Source: PubMed Central journal article supplement (PMC6679542; doi:10.1186/s12864-019-5871-2), 2019-08-02

# UCSC Genome Browser on Zebra finch Jul. 2008 (WUGSC 3.2.4/taeGut1) Assembly

move <<< << < > >> >>> zoom in 1.5x 3x 10x base ZOOM out 1.5x 3x 10x 100x

chr12:3,766,265-3,962,804 196,540 bp. enter position, gene symbol or search terms go

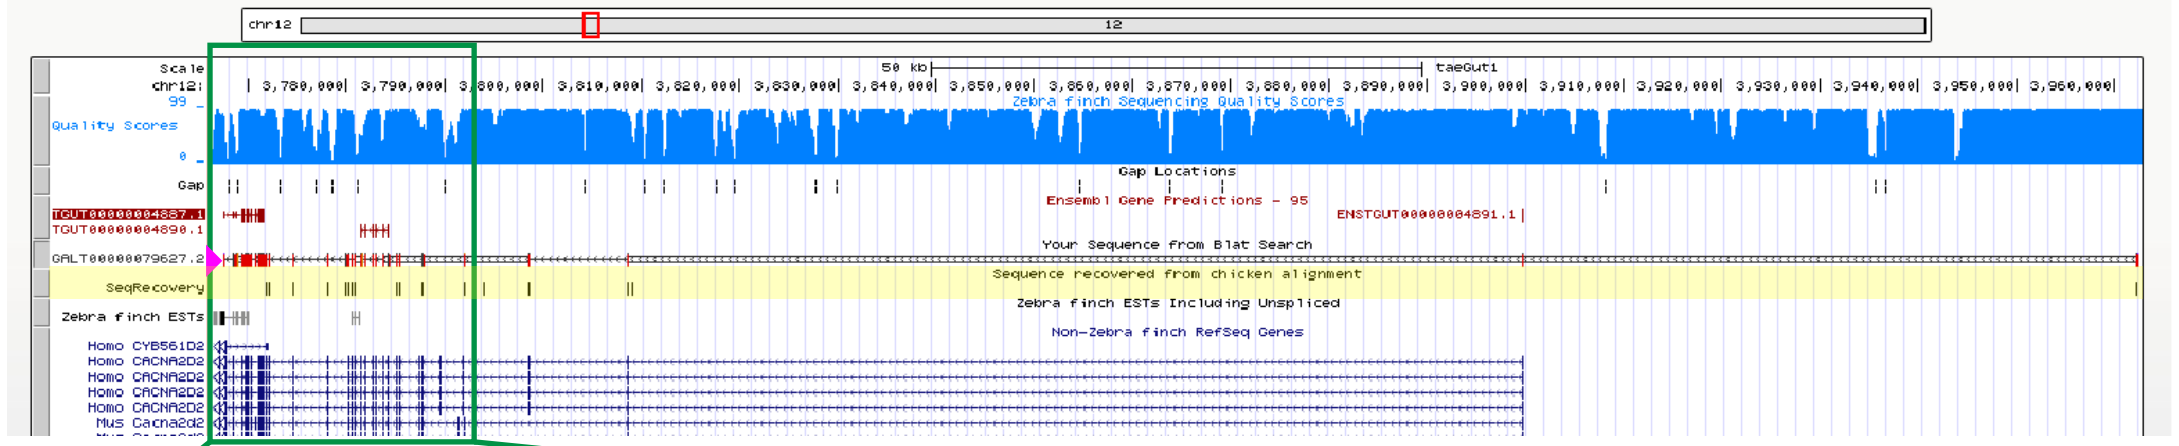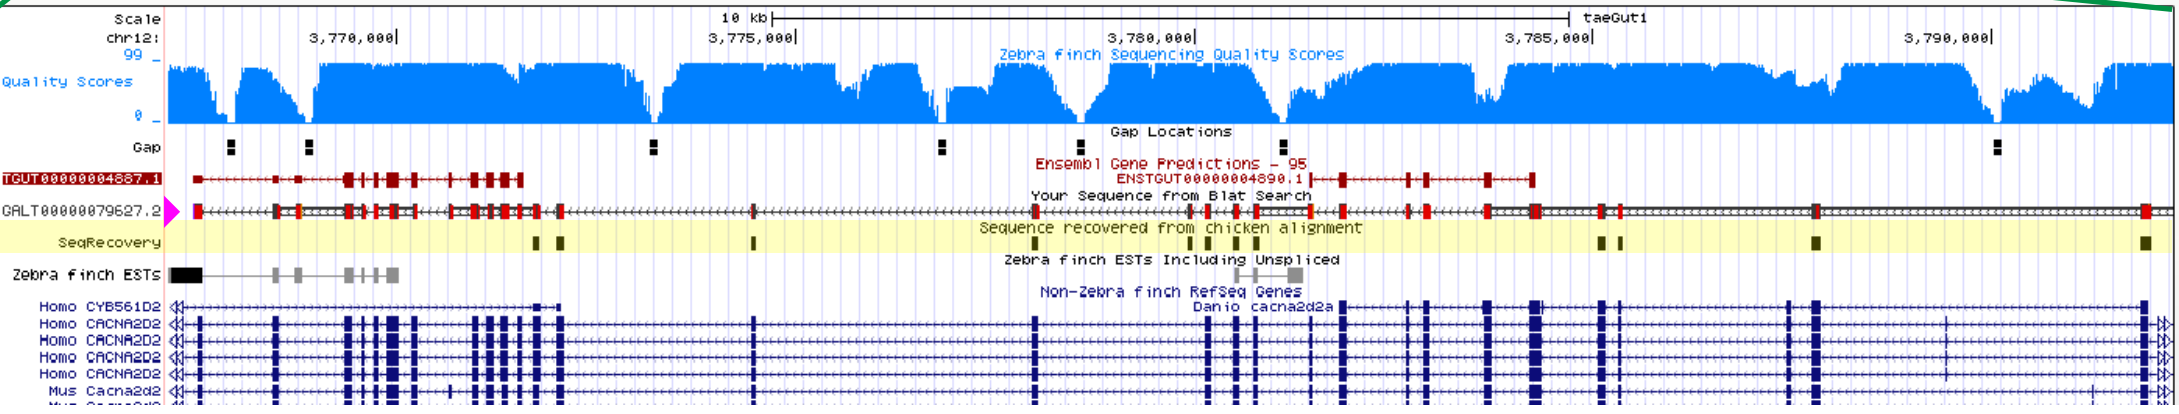

Supplement: 12864_2019_5871_MOESM5_ESM.pdf [file 12864_2019_5871_MOESM5_ESM.pdf]
